# Supplementary material
Source: PubMed Central journal article supplement (PMC2676026)
Supplement: M900088200_1.pdf [file M900088200_1.pdf]

## Supplemental Table S1

Table S1. **Yeast strains used**

| <u>Strain Name</u> | <u>Genotype</u>                                                                                |
|--------------------|------------------------------------------------------------------------------------------------|
| MW1522             | W303 <i>MATa ade2-1 trp1-1 leu2-3,112 ura3-1 his3-11,15 can1-100</i>                           |
| EHY37              | <i>MATa/MAT <math>\alpha</math> SPC29/spc29 <math>\Delta</math> ::KANMX::TRP1::spc29-T240A</i> |
| EHY41*             | <i>MATa spc29 <math>\Delta</math> ::KANMX his3::SPC29::HIS3</i>                                |
| EHY39*             | <i>MATa spc29 <math>\Delta</math> ::KANMX his3::spc29-T240A::HIS3</i>                          |
| EHY45*             | <i>MATa spc29 <math>\Delta</math> ::KANMX his3::spc29-T240D::HIS3</i>                          |
| EHY90              | <i>MATa ura3::GAL-GFP-SPC29::URA3</i>                                                          |
| EHY91              | <i>MATa ura3::GAL-GFP-spc29-T240A::URA3</i>                                                    |
| EHY93              | <i>MATa mps1-1; ura3::GAL-GFP-SPC29::URA3</i>                                                  |

\* : strains contain two tandem copies of the indicated alleles.

## Supplemental Fig. S1

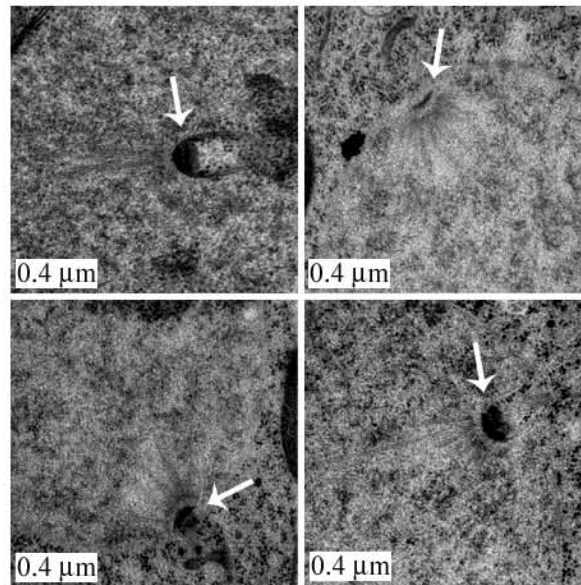

Supplemental Fig. S1. Additional electron micrographs of *spc29-T240A* mitotic spindles. Single thin sections from four additional *spc29-T240A* cells from the experiment pictured in Fig. 2 (I-L) showing monopolar spindles with a single SPB (arrows).
